# Supplementary material for: Root System Architecture, Copper Uptake and Tissue Distribution in Soybean (<em>Glycine max </em>cv.<em> Kowsar</em>) Grown in Copper Oxide Nanoparticles (CuONPs) Amended Soil and Implications to Human Nutrition <strong> </strong>
Source: Preprints.org preprint supplement (doi:10.20944/preprints202008.0015.v1), 2020-08-02
Supplement: Supplementary file 1 [file supplementary]

## Supplementary Information

**Root system architecture, copper uptake and tissue distribution in soybean (*Glycine max* cv. *Kowsar*) grown in copper oxide nanoparticles (CuONPs) amended soil and implications to human nutrition**

<sup>1</sup>Yusefi-Tanha, Elham; <sup>1\*</sup>Fallah, Sina; <sup>2</sup>Rostamnejadi, Ali; <sup>3\*</sup>Pokhrel, Lok Raj

<sup>1</sup>Department of Agronomy, Faculty of Agriculture, Shahrekord University, Shahrekord, Iran

<sup>2</sup> Department of Electroceramics and Electrical Engineering, Malek Ashtar University of Technology, Iran. Email: [rostamnejadi@mut-es.ac.ir](mailto:rostamnejadi@mut-es.ac.ir).

<sup>3</sup>Department of Public Health, The Brody School of Medicine, Department of Health Education and Promotion, College of Health and Human Performance, East Carolina University, Greenville, NC, USA.

\*Corresponding authors: LR Pokhrel, Phone: 252-737-5587; Email: [pokhrell18@ecu.edu](mailto:pokhrell18@ecu.edu).

S Fallah, Phone: +983832324428; Email: [falah1357@yahoo.com](mailto:falah1357@yahoo.com).

**Table S1. Physicochemical properties of the soil used in the experiment.**

| pH   | EC<br>(dS/m) | Organic<br>carbon<br>(g/kg) | Total N<br>(g/kg) | Available P<br>(mg/kg) | Available K<br>(mg/kg) | Cu<br>(mg/kg) | Zn<br>(mg/kg) | Fe<br>(mg/kg) | Mn<br>(mg/kg) |
|------|--------------|-----------------------------|-------------------|------------------------|------------------------|---------------|---------------|---------------|---------------|
| 7.44 | 0.47         | 9.24                        | 0.88              | 11.7                   | 405                    | 0.538         | 0.892         | 5.12          | 6.85          |
